# Supplementary material for: BiVO4/Fe2O3/ZnFe2O4; triple heterojunction for an enhanced PEC performance for hydrogen generation
Source: Royal Society of Chemistry journal article supplement (doi:10.1039/d2ra00900e), 2022-01-01
Supplement: d2ra00900e1.pdf [file d2ra00900e1.pdf]

## Supporting Information

**BiVO<sub>4</sub>/Fe<sub>2</sub>O<sub>3</sub>/ZnFe<sub>2</sub>O<sub>4</sub>; Triple Heterojunction for Enhanced PEC Performance  
for Hydrogen Generation**

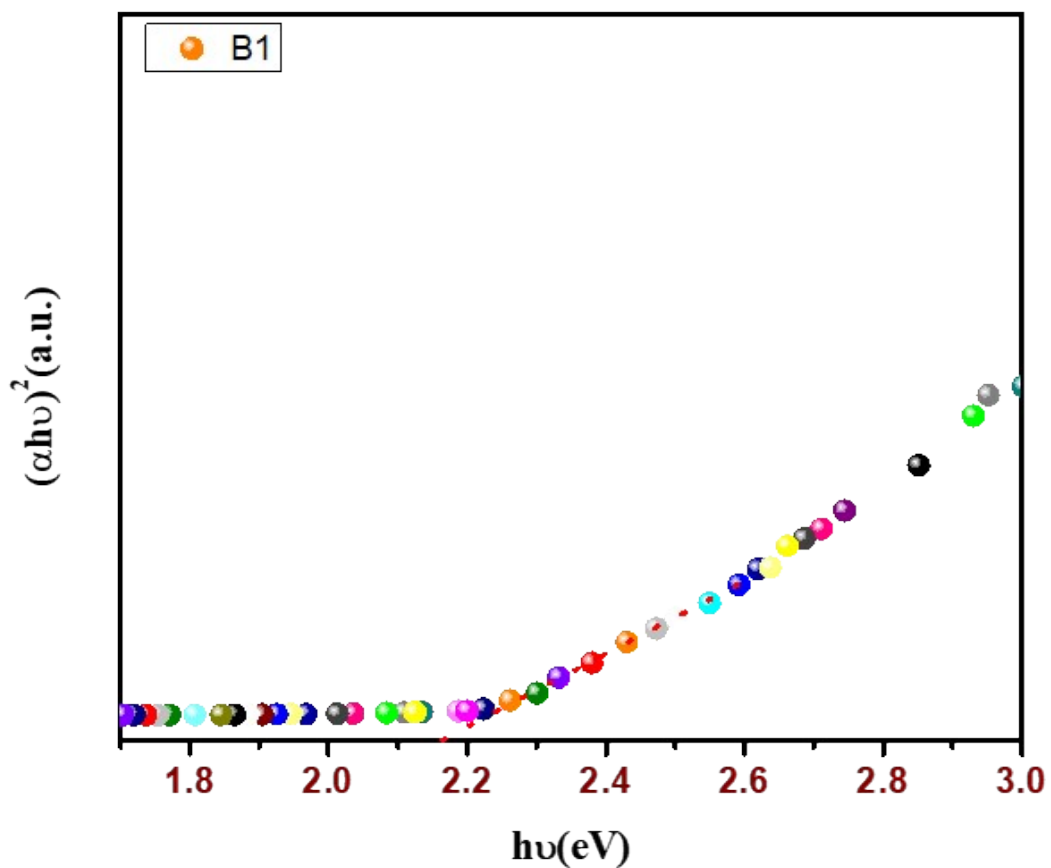

**Fig.S1 Tauc plot of pristine B (Zr:W-BiVO<sub>4</sub>) thin film**

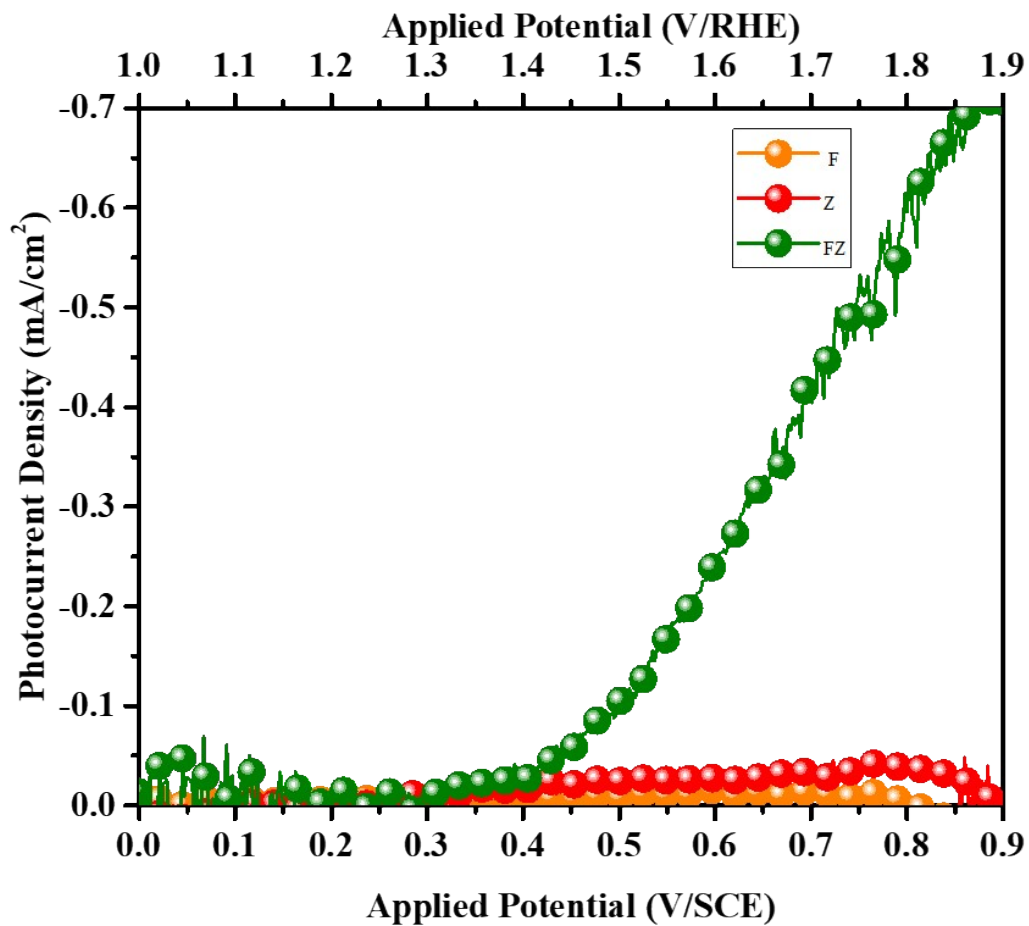

Fig.S2 Current-voltage graph for F, Z and FZ thin films obtained through LSV

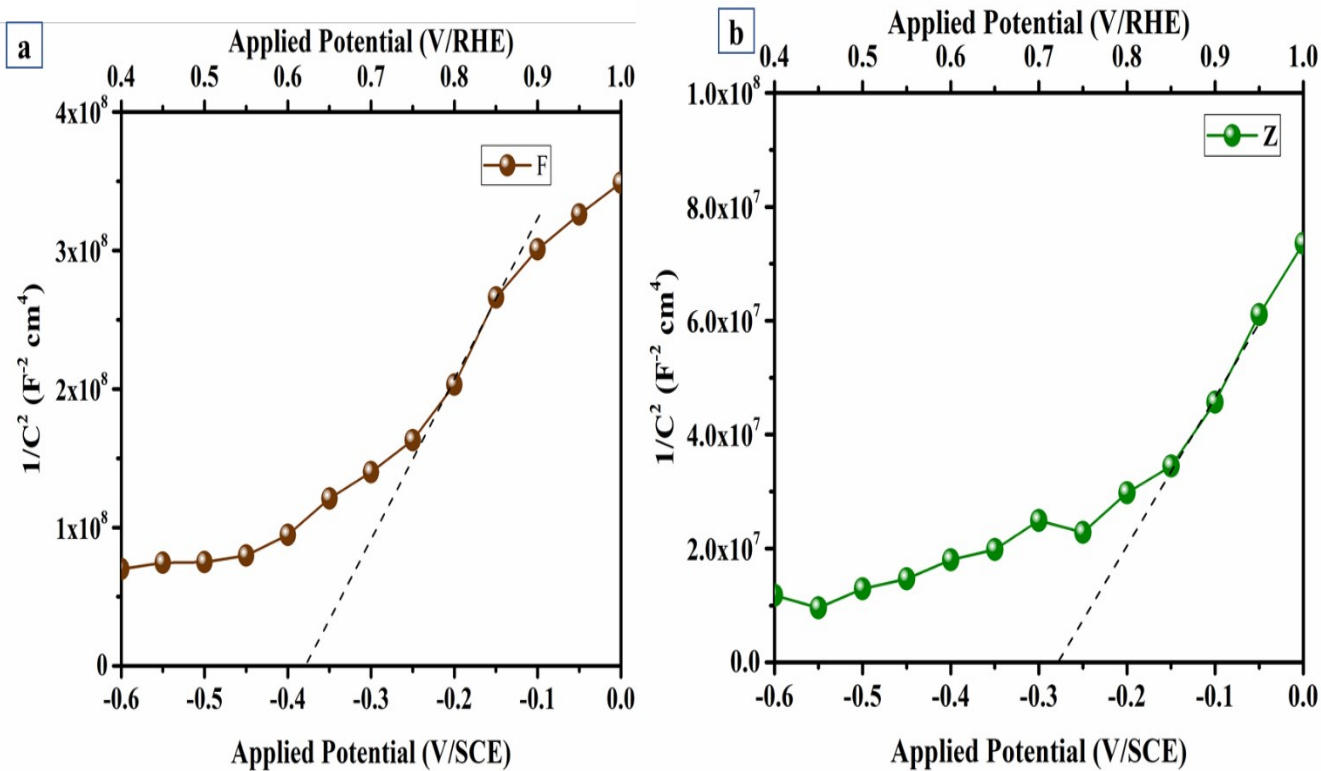

Fig.S3 (a,b) Mott-Schottky plot for F and Z thin film

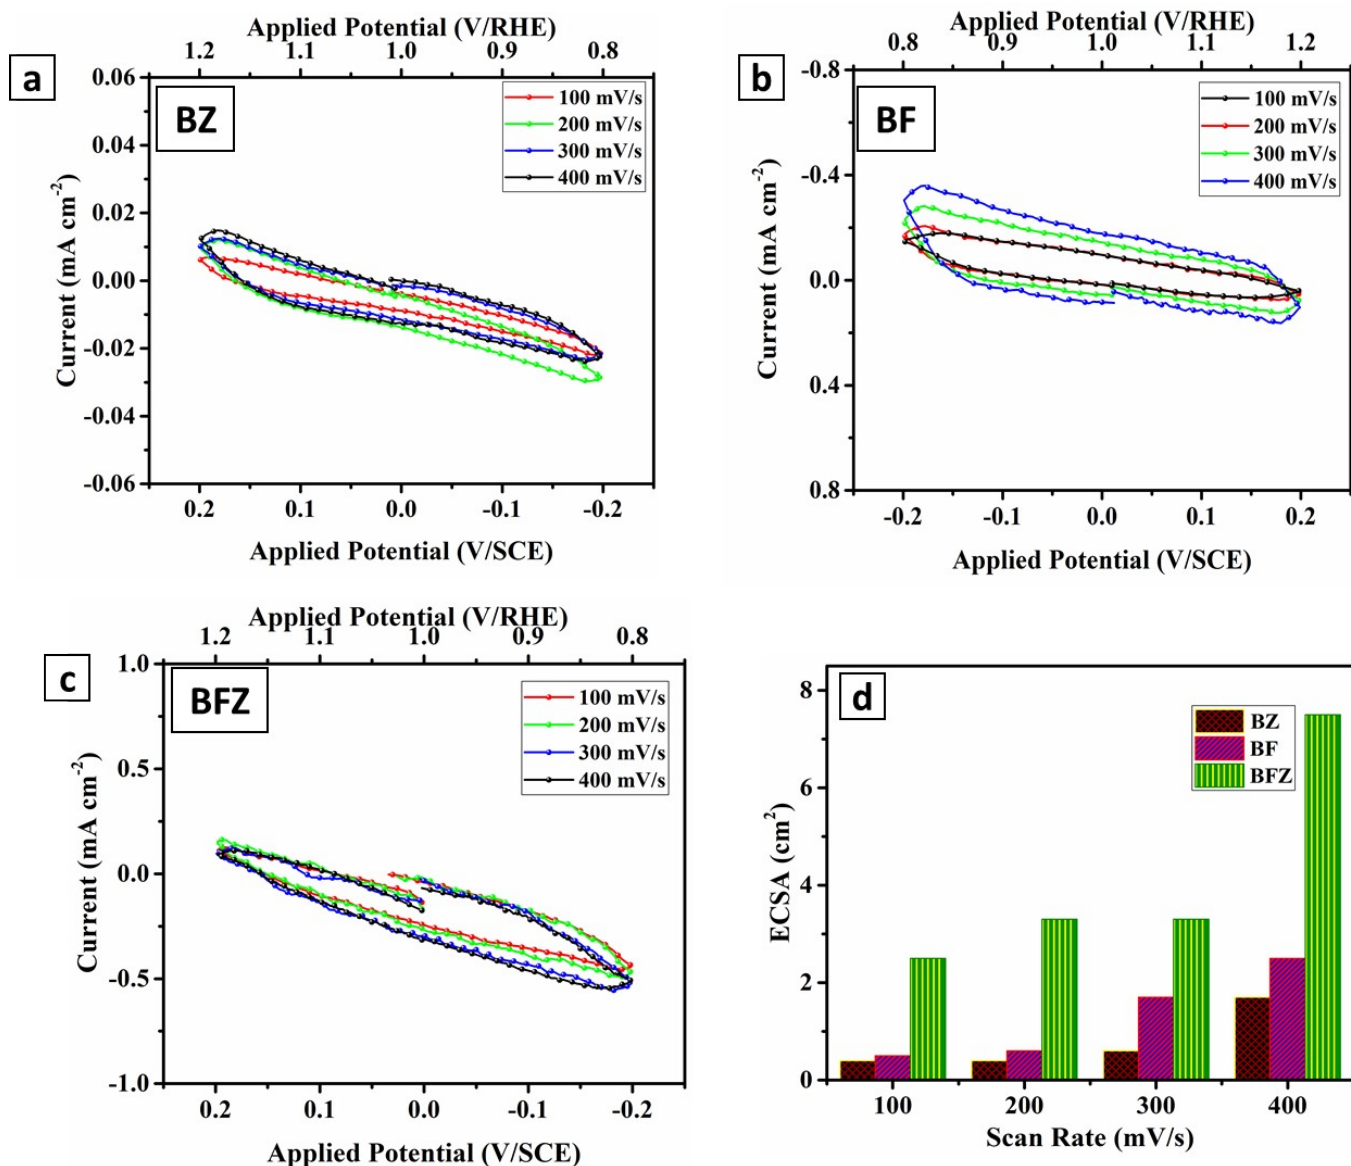

Fig.S4 (a-c) Cyclic voltammety curve for BF, BZ and BFZ thin film recorded in the potential range of -0.2 V to 0.8 V/SCE at different scan rate: (d) ECSA plot at different scan rate

Table S1: Electrochemical surface area (ECSA) value for BF, BZ and BFZ at different scan rate

| Scan Rate (mV/s) | ECSA (cm <sup>2</sup> ) for different Sample |     |     |
|------------------|----------------------------------------------|-----|-----|
|                  | BZ                                           | BF  | BFZ |
| 100              | 0.4                                          | 0.5 | 2.5 |
| 200              | 0.4                                          | 0.6 | 3.3 |
| 300              | 0.6                                          | 1.7 | 3.3 |
| 400              | 1.7                                          | 2.5 | 7.5 |

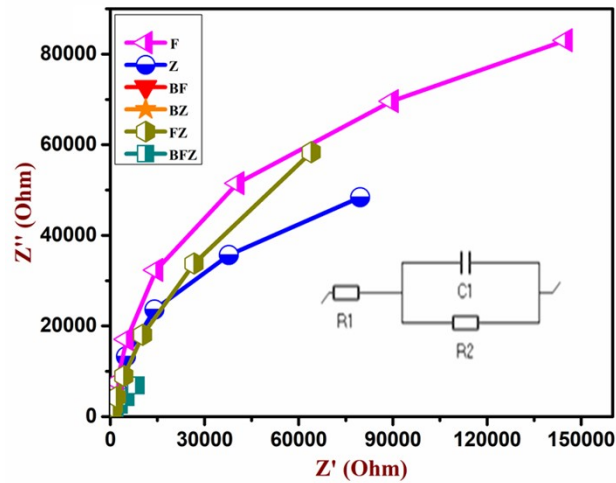

Fig. S5 Nyquist plot for all the prepared thin films; Inset: fitted equivalent circuit

Table S2: Fitted values obtained from the equivalent circuit

| Sample | $R_s$ (Ohm) | $R_{CT}$ (Ohm) | C (F)                  |
|--------|-------------|----------------|------------------------|
| F      | 35.47       | 60.91          | $45.1 \times 10^{-6}$  |
| Z      | 43.86       | 45.35          | $32.27 \times 10^{-6}$ |
| BFZ    | 64.22       | 33.22          | $23.45 \times 10^{-6}$ |

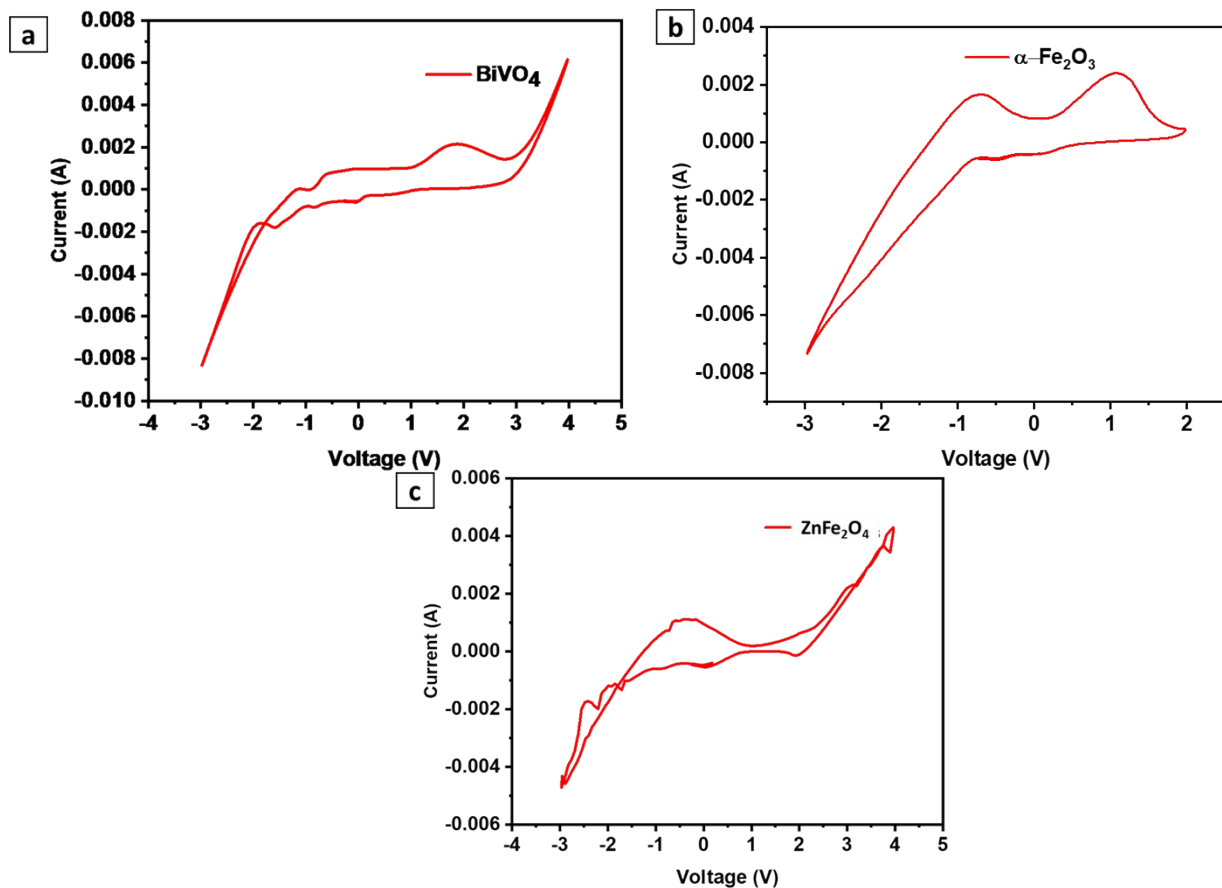

**Fig. S6 (a-c) Cyclic voltammetry curve for B, F and Z**

**Cyclic Voltammetry analysis for calculating the energy levels**

Cyclic voltammetry was executed in 0.1M of tetrabutylammonium phosphorus hexafluoride (TBAPF6) in anhydrous acetonitrile (CH<sub>3</sub>CN) in order to estimate the energy levels (HOMO and LUMO). The redox potentials ( $E_{\text{red}}$  and  $E_{\text{ox}}$ ) obtained from cyclic voltammetry graphs was used to calculate the HOMO & LUMO using the following equations:

$$E(\text{HOMO}) = -e [E_{\text{ox}}^{\text{onset}} + 4.4]$$

$$E(\text{LUMO}) = -e [E_{\text{red}}^{\text{onset}} + 4.4]$$

From the graphs it is clear that pristine BiVO<sub>4</sub> (B) shows  $E_{\text{HOMO}}$  at 3.2 eV and  $E_{\text{LUMO}}$  at 5.4 eV, Fe<sub>2</sub>O<sub>3</sub>(F) shows  $E_{\text{HOMO}}$  at 3.14 eV and  $E_{\text{LUMO}}$  at 5.2 eV and ZnFe<sub>2</sub>O<sub>4</sub> (Z) shows  $E_{\text{HOMO}}$  at 3.0 eV and  $E_{\text{LUMO}}$  at 5.09 eV. The estimated band gap values for B, F and Z comes out to be 2.2 eV, 2.06 eV and 2.09 eV which matches well with the literature reported values. This shows that sample exhibited the type-II heterojunction formation which facilitates the charge transfer kinetics at interface.

Reference:

1. Shafiee A, Salleh MM, Yahaya M. Determination of HOMO and LUMO of [6, 6]-phenyl C61-butyric acid 3-ethylthiophene ester and poly (3-octyl-thiophene-2, 5-diyl) through voltammetry characterization. Sains Malaysiana. 2011 Feb 1;40(2):173-6.

2. Leonat L, Sbarcea G, Branzoi IV. Cyclic voltammetry for energy levels estimation of organic materials. UPB Sci Bull Ser B. 2013 Jan 1;75(3):111-8.
